# Supplementary material for: Cross-coupling of alkyl halides with Grignard reagents using nickel and palladium complexes bearing η3-allyl ligand as catalysts
Source: Royal Society of Chemistry journal article supplement (doi:10.1039/b612586g), 2006-11-24
Supplement: b612586g.pdf [file b612586g.pdf]

# Supplementary Material (ESI) for Chemical Communications  
# This journal is (c) The Royal Society of Chemistry 2006

## Cross-Coupling Reaction of Alkyl Halides with Grignard Reagents Using Nickel and Palladium Complexes Bearing $\eta^3$ -Allyl Ligand as Catalysts

Jun Terao,\* Yoshitaka Naitoh, Hitoshi Kuniyasu, Nobuaki Kambe\*

Department of Science and Technology Center for Atoms, Molecules and Ions Control & Applied Chemistry, Graduate School of Engineering, Osaka University, Suita, Osaka 565-0871 (Japan)

Fax: (+81)6-6879-7390

E-mail: terao@chem.eng.osaka-u.ac.jp

### Typical Experimental Procedures and Analytical Data of Products.

#### General

$^1\text{H}$  NMR and  $^{13}\text{C}$  NMR spectra were recorded with a JEOL JNM-Alice 400 spectrometer (400 MHz and 100 MHz, respectively). Chemical shifts are given in parts per million ( $\delta$ ) downfield from internal tetramethylsilane. Infrared spectra were obtained with a Perkin-Elmer FT-IR (Model 1600). Both conventional and high resolution mass spectra were recorded with a JEOL JMS-DX303HF spectrometer. GC Mass analyses (EI) were run using a JEOL JMS-mate operating in the electron impact mode (70 eV) equipped with a RTX-5 30MX.25MMX.25U column. Elemental analyses were performed on a Perkin Elmer 240C apparatus.

#### 1-Cyclopropylnonane

See ref. 8 for the synthetic procedure. IR (neat): 3076, 3000, 2957, 2923, 2864, 2360, 1464, 1378, 1014, 911, 820, 721  $\text{cm}^{-1}$ ;  $^1\text{H}$  NMR (400 MHz,  $\text{CDCl}_3$ ):  $\delta$ =-0.02-0.01 (m, 2H), 0.34-0.43 (m, 2H), 0.60-0.78 (m, 1H), 0.89 (t,  $J$ =6.8 Hz, 3H), 1.15-1.38 (m, 16H),  $^{13}\text{C}$  NMR (100MHz,  $\text{CDCl}_3$ ):  $\delta_{\text{u}}$ =11.1, 14.3,  $\delta_{\text{d}}$ =4.6, 22.9, 29.5, 29.7, 29.8, 29.9, 32.1, 34.9; MS (EI)  $m/z$  (relative intensity, %) 168 ( $\text{M}^+$ , 1.48), 125 (4), 111 (19), 97 (49), 83 (74), 69 (91), 55 (100), 41 (59); HR-MS: calcd for  $\text{C}_{12}\text{H}_{24}$  ( $\text{M}^+$ ): 168.1878, found 168.1879; elemental analysis: calcd for  $\text{C}_{12}\text{H}_{24}$ : C, 85.63; H, 14.37. found: C, 85.32; H, 14.02.

#### Bis( $\eta^3$ -allyl)palladium CAS Registry Number: 12240-87-8

Allylmagnesium bromide (0.5 M in  $\text{Et}_2\text{O}$ , 4.0 mL, 2.0 mmol) was added drop wise to a stirred solution of  $\text{PdCl}_2$  (179.0 mg, 1.0 mmol) in  $\text{Et}_2\text{O}$  (4.0 mL) at  $-40^\circ\text{C}$  over 1 h, and then the solution was cooled to  $-78^\circ\text{C}$ . After stirring for 15 h, the  $\text{Et}_2\text{O}$  was removed at  $-78^\circ\text{C}$  in vacuo. The resulting solid was

extracted with pentane at -40 °C, filtered at -40 °C to remove insoluble salts, and concentrated under high vacuum at -78 °C to give yellow solids (47.2 mg, 26%).

***cis*-Bis( $\eta^3$ -allyl)palladium**

$^1\text{H}$  NMR (400MHz, toluene- $d_8$ , -30 °C):  $\delta$ =2.74(d,  $J$ =13.2 Hz, 2H), 4.35(d,  $J$ =7.1 Hz, 2H), 4.96(tt,  $J$ =7.1, 13.2 Hz, 1H),  $^{13}\text{C}$  NMR (100 MHz, toluene- $d_8$ , -30 °C):  $\delta$ =54.8, 116.1.

***trans*-Bis( $\eta^3$ -allyl)palladium**

$^1\text{H}$  NMR (400MHz, toluene- $d_8$ , -30 °C):  $\delta$ =2.65(d,  $J$ =13.2 Hz, 2H), 4.35(d,  $J$ =7.1 Hz, 2H), 5.04(tt,  $J$ =7.1, 13.4 Hz, 1H),  $^{13}\text{C}$  NMR (100 MHz, toluene- $d_8$ , -30 °C):  $\delta$ =55.6, 115.8.

**Bis( $\eta^3$ -allyl)nickel** CAS Registry Number: 12077-85-9

Allylmagnesium bromide (0.5 M in Et<sub>2</sub>O, 4.0 mL, 2.0 mmol) was added drop wise to a stirred solution of NiCl<sub>2</sub> (129.6 mg, 1.0 mmol) in Et<sub>2</sub>O (4.0 mL) at -40 °C over 1 h, and then the solution was cooled to -78 °C. After stirring for 15 h, the Et<sub>2</sub>O was removed at -78 °C in vacuo. The resulting solid was extracted with pentane at -40 °C, filtered at -40 °C to remove insoluble salts, and concentrated under high vacuum at -78 °C to give yellow solids (195.7 mg, 69%).

***cis*-Bis( $\eta^3$ -allyl)nickel**

$^1\text{H}$  NMR (400MHz, toluene- $d_8$ , -50 °C):  $\delta$ =2.26(d,  $J$ =14.4 Hz, 2H), 3.70(d,  $J$ =7.6 Hz, 2H), 4.96(tt,  $J$ =7.6, 14.4 Hz, 1H),  $^{13}\text{C}$  NMR (100 MHz, toluene- $d_8$ , -30 °C):  $\delta$ =53.5, 112.8.

***trans*-Bis( $\eta^3$ -allyl)nickel**

$^1\text{H}$  NMR (400MHz, toluene- $d_8$ , -50 °C):  $\delta$ =1.81(d,  $J$ =13.9 Hz, 2H), 3.92(d,  $J$ =7.3 Hz, 2H), 4.96(tt,  $J$ =7.3 13.9 Hz, 1H),  $^{13}\text{C}$  NMR (100 MHz, toluene- $d_8$ , -30 °C):  $\delta$ =53.5, 112.7.

**[(C<sub>2</sub>H<sub>5</sub>)Pd( $\eta^1$ , $\eta^3$ -C<sub>3</sub>H<sub>5</sub>)<sub>2</sub>][MgBr<sup>+</sup>]**

To a THF- $d_8$  solution (1.0 mL) of bis( $\eta^3$ -allyl)palladium (110 mg, 0.58 mmol) was added a THF- $d_8$  solution of EtMgBr (0.90 M, 1.0 mL, 0.90 mmol) at -60 °C under argon. After stirring the mixture for 1 h, the  $^1\text{H}$  NMR spectrum indicated that [(C<sub>2</sub>H<sub>5</sub>)Pd( $\eta^1$ , $\eta^3$ -C<sub>3</sub>H<sub>5</sub>)<sub>2</sub>][MgBr<sup>+</sup>] was formed in 94% NMR yield.  $^1\text{H}$  NMR (400 MHz, THF- $d_8$ , -60 °C):  $\delta$ =0.6-0.9 (m, 2H) 1.26 (t,  $J$ =7.7 Hz, 3H), 1.51 (d,  $J$ =14.9 Hz, 1H), 1.55 (d,  $J$ =14.4 Hz, 1H), 1.71 (d,  $J$ =8.8 Hz, 2H), 2.01 (d,  $J$ =6.9 Hz, 1H), 2.15 (d,  $J$ =6.6 Hz, 1H), 3.41 (d,  $J$ =9.3 Hz, 1H), 3.91 (d,  $J$ =16.4 Hz, 1H), 4.3-4.6 (m, 1H), 6.1-6.4 (m, 1H),  $^{13}\text{C}$  NMR (100 MHz, THF- $d_8$ , -60 °C):  $\delta$ =8.3, 22.8, 23.4, 45.9, 50.0, 91.1, 113.3, 152.7.

# Supplementary Material (ESI) for Chemical Communications  
# This journal is (c) The Royal Society of Chemistry 2006

**Registry No of other products and their references**

The following compounds are known and their spectral data ( $^1\text{H}$  NMR,  $^{13}\text{C}$  NMR, and Mass spectra) were consistent with those previously reported.

**Octylbenzene.** CAS Registry Number: 2189-60-8

**1-Decene.** CAS Registry Number: 872-05-9

**1-Bromo-4-butyl-benzene.** CAS Registry Number: 41492-05-1
